# Supplementary material for: Magnetophoretic transport of functionalised iron-oxide nanoparticles through biomimetic hydrogels and extracellular matrix
Source: Royal Society of Chemistry journal article supplement (doi:10.1039/d6na00088f), 2026-05-12
Supplement: d6na00088f1.pdf [file d6na00088f1.pdf]

## Supplementary Information

### Magnetophoretic transport of functionalised iron-oxide nanoparticles through biomimetic hydrogels and extracellular matrix

Stephen Lyons,<sup>a</sup> Katie M<sup>c</sup>Garry,<sup>b</sup> Aline F. Miller,<sup>c</sup> Rinki Singh,<sup>a</sup> Aoife Morrin<sup>a\*</sup> and Dermot F. Brougham<sup>b\*</sup>

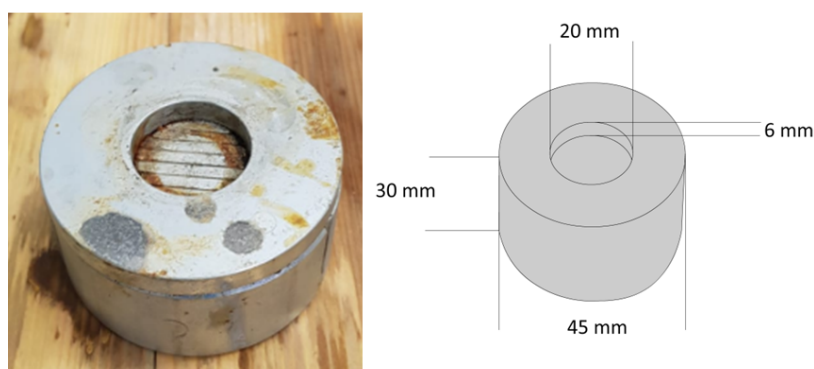

**Figure S1.** Left, photograph of the GIAMAG magnet. Right, the dimensions of the magnet, note that it provides magnetic force ( $B \cdot \nabla B$ ) of  $c.260 \text{ T}^2 \cdot \text{m}^{-1}$  at the pole face.

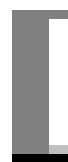

**Figure S2.** Image of progress of the NMR front through 0.3 %w/v agarose.

**Table S1.** Magnetophoretic velocities ( $v_{exp}$ ) for low and very high magnetic field gradients for 8 nm PEG1000-MNP, Arg-MNP, and Cit-MNP suspensions<sup>a</sup> through Agarose(H<sub>2</sub>O) and Agarose(PBS) as the isotonic condition.

| <b>Surface chemistry</b> | <b>Low gradient</b>                          |                                 | <b>Very high gradient</b>       |                                 |
|--------------------------|----------------------------------------------|---------------------------------|---------------------------------|---------------------------------|
|                          | Agarose(H <sub>2</sub> O) (Hypotonic)        | Agarose(PBS) (Isotonic)         | Agarose(H <sub>2</sub> O)       | Agarose(PBS) (Isotonic)         |
|                          | $v_{exp}$ (mm h <sup>-1</sup> ) <sup>b</sup> | $v_{exp}$ (mm h <sup>-1</sup> ) | $v_{exp}$ (mm h <sup>-1</sup> ) | $v_{exp}$ (mm h <sup>-1</sup> ) |
| <i>PEG1000</i>           | 0.37 (±0.02)                                 | 0.37 (±0.02)                    | 4.69 (±0.37)                    | 4.72                            |
| <i>Arginine</i>          | 0.35 (±0.01)                                 | 0.31 (±0.02)                    | 4.73 (±0.15)                    | 4.75                            |
| <i>Citrate</i>           | 0.63 (±0.02)                                 | 0.67 (±0.04)                    | 5.35 (±0.07)                    | 5.43                            |

<sup>a</sup> PEG1000-MNPs from Batch 2,  $d_{TEM}$  8.9±0.8 nm ( $d_{hyd}$  24.1 nm, PDI 0.16); Arg-MNPs (28.0 nm, 0.16); Cit-MNPs (12.1 nm, 0.17).

<sup>b</sup> Values taken from <sup>12</sup>; n=4; R<sup>2</sup>>0.98 for all data sets.

**Table S2.**  $v_{exp}$  values for PEG-MNP, Arg-MNP and Cit-MNP suspensions through agarose(H<sub>2</sub>O); agarose(ISF<sub>syn</sub>); agarose-collagen(ISF<sub>syn</sub>), and; ECM under a low magnetic field gradient.

| <b>Surface chemistry</b> | $v_{exp}$ <sup>a</sup> (mm h <sup>-1</sup> ) |                              |                                       |              |
|--------------------------|----------------------------------------------|------------------------------|---------------------------------------|--------------|
|                          | Agarose(H <sub>2</sub> O) <sup>b</sup>       | Agarose(ISF <sub>syn</sub> ) | Agarose-collagen(ISF <sub>syn</sub> ) | ECM          |
| <i>PEG1000</i>           | 0.37 (±0.02)                                 | 0.37 (±0.02)                 | 0.32 (±0.02)                          | 0.27 (±0.03) |
| <i>Arginine</i>          | 0.35 (±0.01)                                 | 0.32 (±0.01)                 | 0.16 (±0.02)                          | 0.22 (±0.02) |
| <i>Citrate</i>           | 0.63 (±0.02)                                 | 0.68 (±0.03)                 | 0.46 (±0.03)                          | 0.41 (±0.02) |

<sup>a</sup> 8 nm MNPs are from Batch 2. Suspensions were at ~1 mg mL<sup>-1</sup>; agarose 0.3 %w/v (high EEO), n=4 ; R<sup>2</sup>>0.98

<sup>b</sup> Data from Table S1.

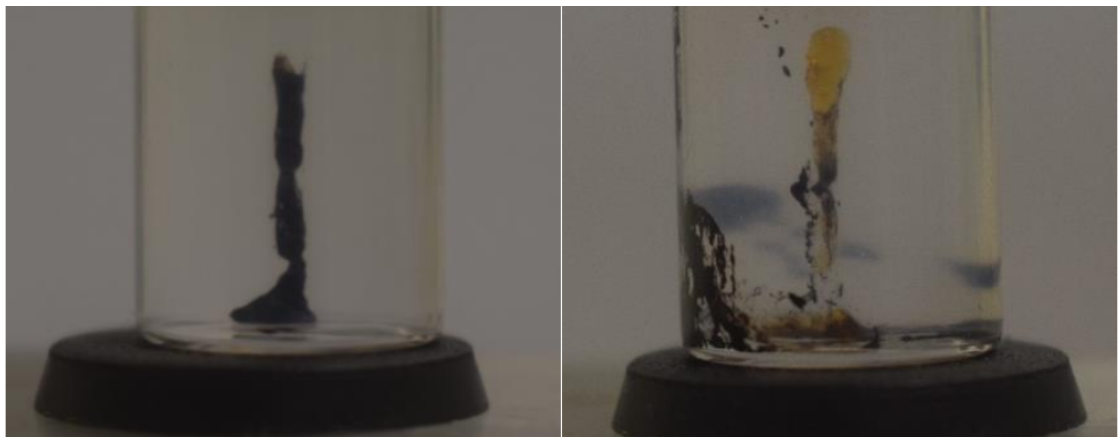

**Figure S3.** Left, PEG1000-MNPs in agarose/collagen ISF during magnetophoretic transport (after the front has reached the bottom of the vial, hence the spreading). Right, the same gel after all the deposit has passed through.

**Figure S4.** Selected images of agarose(H<sub>2</sub>O) and agarose-collagen(H<sub>2</sub>O) surface morphologies examined using SEM (Hitachi S-3400N) after freeze-drying samples at -58 °C for 48 h in a lyophiliser. Prior to lyophilisation, the gels were immersed in liquid nitrogen. Samples were gold-sputtered for analysis.
